# Supplementary material
Source: PubMed Central journal article supplement (PMC6248658)
Supplement: bgy062_suppl_supplementary_tables.pdf [file bgy062_suppl_supplementary_tables.pdf]

**Supplementary Table S1:** List of the stemness-related genes.

| <b>Gene</b>    | <b>Description</b>                                                   | <b>Chromosome</b> | <b>Start</b> | <b>End</b> |
|----------------|----------------------------------------------------------------------|-------------------|--------------|------------|
| <i>NES</i>     | Nestin                                                               | 1                 | 156638555    | 156647189  |
| <i>CXCR4</i>   | Chemokine (C-X-C Motif) Receptor 4                                   | 2                 | 136871918    | 136875725  |
| <i>ITGA6</i>   | Integrin, Alpha 6                                                    | 2                 | 173292313    | 173371181  |
| <i>ACPP</i>    | Acid Phosphatase, Prostate                                           | 3                 | 132036210    | 132087146  |
| <i>TP63</i>    | Tumor Protein P63                                                    | 3                 | 189349215    | 189615068  |
| <i>NFKB1</i>   | Nuclear Factor Of Kappa Light Polypeptide Gene Enhancer In B-Cells 1 | 4                 | 103422485    | 103538459  |
| <i>PROM1</i>   | Prominin 1                                                           | 4                 | 15969848     | 16085623   |
| <i>ITGA1</i>   | Integrin, Alpha 1                                                    | 5                 | 52084135     | 52249485   |
| <i>EGFR</i>    | Epidermal Growth Factor Receptor                                     | 7                 | 55086724     | 55275031   |
| <i>MET</i>     | MET Proto-Oncogene, Receptor Tyrosine Kinase                         | 7                 | 116312458    | 116438440  |
| <i>ALDH1A1</i> | Aldehyde Dehydrogenase 1 Family, Member A1                           | 9                 | 75515577     | 75568233   |
| <i>NOTCH1</i>  | Notch 1                                                              | 9                 | 139388895    | 139440238  |
| <i>ITGB1</i>   | Integrin, Beta 1                                                     | 10                | 33189245     | 33247293   |
| <i>PTEN</i>    | Phosphatase And Tensin Homolog                                       | 10                | 89623194     | 89728532   |
| <i>CD44</i>    | CD44 Molecule (Indian Blood Group)                                   | 11                | 35160416     | 35253949   |
| <i>FOLH1</i>   | Folate Hydrolase (Prostate-Specific Membrane Antigen) 1              | 11                | 49168186     | 49230222   |
| <i>WNT1</i>    | Wingless-Type MMTV Integration Site Family, Member 1                 | 12                | 49372235     | 49376396   |
| <i>AKT1</i>    | V-Akt Murine Thymoma Viral Oncogene Homolog 1                        | 14                | 105235686    | 105262080  |
| <i>ABCC1</i>   | ATP-Binding Cassette, Sub-Family C (CFTR/MRP), Member 1              | 16                | 16043433     | 16236930   |
| <i>ALOX12</i>  | Arachidonate 12-Lipoxygenase                                         | 17                | 6899383      | 6914055    |
| <i>CCL5</i>    | Chemokine (C-C Motif) Ligand 5                                       | 17                | 34198495     | 34207377   |
| <i>GDF15</i>   | Growth Differentiation Factor 15                                     | 19                | 18496967     | 18499986   |
| <i>ERG</i>     | V-Ets Avian Erythroblastosis Virus E26 Oncogene Homolog              | 21                | 39739182     | 40033704   |
| <i>TMPRSS2</i> | Transmembrane Protease, Serine 2                                     | 21                | 42836477     | 42880085   |
| <i>AR</i>      | Androgen Receptor                                                    | X                 | 66763874     | 66915580   |

**Supplementary Table S2:** Associations between 19 genotyped SNPs and overall survival of prostate cancer patients.

| SNP        | Chr. | Position (hg19) | Gene           | Location      | Allele <sup>a</sup> | EAF <sup>b</sup> | Frequency <sup>c</sup> |           | Overall Survival         |                       |                   |
|------------|------|-----------------|----------------|---------------|---------------------|------------------|------------------------|-----------|--------------------------|-----------------------|-------------------|
|            |      |                 |                |               |                     |                  | All                    | Death     | HR (95% CI) <sup>d</sup> | <i>P</i> <sup>d</sup> | FPRP <sub>d</sub> |
| rs7619549  | 3    | 189522258       | <i>TP63</i>    | Intron        | C/T                 | 0.47             | 305/608/236            | 70/115/30 | 0.76 (0.62-0.93)         | 0.009                 | 0.072             |
| rs2447859  | 5    | 52178056        | <i>ITGA1</i>   | Intron        | C/T                 | 0.20             | 738/356/56             | 149/62/4  | 0.70 (0.54-0.91)         | 0.008                 | 0.069             |
| rs2456206  | 5    | 52179119        | <i>ITGA1</i>   | Intron        | C/T                 | 0.20             | 735/357/54             | 148/62/4  | 0.71 (0.55-0.92)         | 0.009                 | 0.077             |
| rs10940277 | 5    | 52184613        | <i>ITGA1</i>   | Intron        | T/C                 | 0.33             | 514/514/118            | 90/96/28  | 1.26 (1.03-1.54)         | 0.027                 | 0.198             |
| rs1468727  | 7    | 55230105        | <i>EGFR</i>    | Intron        | G/A                 | 0.25             | 650/422/77             | 130/76/9  | 0.76 (0.60-0.95)         | 0.017                 | 0.135             |
| rs2299436  | 7    | 116341383       | <i>MET</i>     | Intron        | T/C                 | 0.25             | 643/449/58             | 112/88/15 | 1.28 (1.03-1.58)         | 0.027                 | 0.196             |
| rs2299437  | 7    | 116341488       | <i>MET</i>     | Intron        | C/T                 | 0.25             | 643/449/58             | 112/88/15 | 1.28 (1.03-1.58)         | 0.027                 | 0.196             |
| rs7027604  | 9    | 75554952        | <i>ALDH1A1</i> | Intron        | G/T                 | 0.42             | 379/566/201            | 85/97/32  | 0.79 (0.65-0.96)         | 0.019                 | 0.149             |
| rs10827164 | 10   | 33232628        | <i>ITGB1</i>   | Intron        | A/G                 | 0.36             | 474/511/161            | 78/98/38  | 1.25 (1.03-1.51)         | 0.023                 | 0.173             |
| rs9666607  | 11   | 35226155        | <i>CD44</i>    | Exon-missense | C/T                 | 0.31             | 547/493/109            | 95/92/28  | 1.28 (1.04-1.58)         | 0.018                 | 0.141             |
| rs35597    | 16   | 16158034        | <i>ABCC1</i>   | Intron        | C/T                 | 0.48             | 320/562/267            | 48/102/65 | 1.32 (1.08-1.60)         | 0.005                 | 0.046             |
| rs35607    | 16   | 16162480        | <i>ABCC1</i>   | Intron        | A/G                 | 0.16             | 810/304/32             | 163/48/3  | 0.71 (0.54-0.95)         | 0.020                 | 0.152             |
| rs35610    | 16   | 16163273        | <i>ABCC1</i>   | Intron        | G/T                 | 0.16             | 813/301/31             | 164/47/3  | 0.72 (0.54-0.96)         | 0.023                 | 0.172             |
| rs4148354  | 16   | 16174506        | <i>ABCC1</i>   | Intron        | T/C                 | 0.46             | 334/561/252            | 76/99/40  | 0.80 (0.66-0.97)         | 0.023                 | 0.169             |
| rs11075295 | 16   | 16177687        | <i>ABCC1</i>   | Intron        | T/C                 | 0.15             | 845/272/30             | 170/41/3  | 0.70 (0.52-0.94)         | 0.019                 | 0.150             |
| rs11864374 | 16   | 16201885        | <i>ABCC1</i>   | Intron        | C/T                 | 0.24             | 668/414/66             | 144/64/7  | 0.70 (0.55-0.90)         | 0.005                 | 0.045             |
| rs212083   | 16   | 16227943        | <i>ABCC1</i>   | Intron        | G/A                 | 0.18             | 764/349/36             | 157/55/2  | 0.62 (0.47-0.82)         | 0.001                 | 0.009             |
| rs16982345 | 19   | 18500722        | <i>GDF15</i>   | 3' downstream | C/T                 | 0.26             | 636/428/82             | 114/78/22 | 1.29 (1.05-1.59)         | 0.016                 | 0.127             |
| rs2836542  | 21   | 39955438        | <i>ERG</i>     | Intron        | G/T                 | 0.36             | 470/529/151            | 73/104/38 | 1.27 (1.05-1.53)         | 0.015                 | 0.122             |

Abbreviations: SNP: Single nucleotide polymorphism; HR: Hazards ratio; CI: Confidence interval; FPRP: False positive report probability.

<sup>a</sup> Reference/effect allele.

<sup>b</sup> Effect allele frequency.

<sup>c</sup> Major homozygote/heterozygote/rare homozygote.

<sup>d</sup> Multivariate cox regression analyses were adjusted for age, Gleason score, stage, and primary treatment.

**Supplementary Table S3.** Summary of typed and imputed SNPs in the ten gene regions.

| <b>Gene</b> <sup>a</sup> | <b>Number of SNPs</b> |                                   |
|--------------------------|-----------------------|-----------------------------------|
|                          | <b>Typed</b>          | <b>Typed+Imputed</b> <sup>b</sup> |
| <i>TP63</i>              | 79                    | 706                               |
| <i>ITGA1</i>             | 71                    | 28                                |
| <i>EGFR</i>              | 71                    | 242                               |
| <i>MET</i>               | 21                    | 114                               |
| <i>LDH1A1</i>            | 13                    | 176                               |
| <i>ITGB1</i>             | 16                    | 512                               |
| <i>CD44</i>              | 47                    | 72                                |
| <i>ABCC1</i>             | 62                    | 601                               |
| <i>GDF15</i>             | 4                     | 748                               |
| <i>ERG</i>               | 108                   | 387                               |
| All                      | 492                   | 3586                              |

<sup>a</sup> Include  $\pm$  2kb flanking regions.

<sup>b</sup> All imputed SNPs with info value  $\geq$  0.8.

**Supplementary Table S4:** Associations between 127 imputed SNPs and overall survival of prostate cancer patients.

| SNP         | Chr. | Position  | Gene  | G/I       | Allele <sup>a</sup> | EAF  | HR (95% CI) <sup>b</sup> | P <sup>b</sup> | FPRP <sup>b</sup> | SNPinfo <sup>c</sup> | RegulomeDB <sup>d</sup> |
|-------------|------|-----------|-------|-----------|---------------------|------|--------------------------|----------------|-------------------|----------------------|-------------------------|
| rs7638864   | 3    | 189521372 | TP63  | Imputed   | G/T                 | 0.24 | 0.71 (0.55-0.91)         | 0.008          | 0.069             | --                   | 4                       |
| rs7638725   | 3    | 189521373 | TP63  | Imputed   | C/T                 | 0.24 | 0.71 (0.55-0.91)         | 0.008          | 0.069             | --                   | 4                       |
| rs7619549   | 3    | 189522258 | TP63  | Genotyped | C/T                 | 0.47 | 0.76 (0.62-0.93)         | 0.009          | 0.072             | --                   | 5                       |
| rs73197850  | 3    | 189529056 | TP63  | Imputed   | T/C                 | 0.23 | 0.73 (0.57-0.94)         | 0.017          | 0.130             | --                   | 6                       |
| rs7650138   | 3    | 189530211 | TP63  | Imputed   | C/T                 | 0.23 | 0.73 (0.57-0.94)         | 0.015          | 0.119             | --                   | 5                       |
| rs4642323   | 5    | 52172965  | ITGA1 | Imputed   | C/A                 | 0.09 | 1.41 (1.05-1.88)         | 0.020          | 0.156             | --                   | 6                       |
| rs2456223   | 5    | 52177346  | ITGA1 | Imputed   | A/T                 | 0.20 | 0.70 (0.54-0.91)         | 0.008          | 0.071             | --                   | 6                       |
| rs2447859   | 5    | 52178056  | ITGA1 | Genotyped | C/T                 | 0.20 | 0.70 (0.54-0.91)         | 0.008          | 0.069             | --                   | 7                       |
| rs2447860   | 5    | 52178299  | ITGA1 | Imputed   | A/G                 | 0.20 | 0.70 (0.54-0.91)         | 0.008          | 0.065             | --                   | 6                       |
| rs2447861   | 5    | 52178339  | ITGA1 | Imputed   | A/G                 | 0.20 | 0.70 (0.54-0.91)         | 0.008          | 0.065             | --                   | 7                       |
| rs142084510 | 5    | 52178399  | ITGA1 | Imputed   | C/CTCTT             | 0.20 | 0.70 (0.54-0.91)         | 0.008          | 0.065             | --                   | 7                       |
| rs2927687   | 5    | 52178524  | ITGA1 | Imputed   | A/G                 | 0.20 | 0.70 (0.54-0.91)         | 0.008          | 0.065             | --                   | 5                       |
| rs2447862   | 5    | 52178971  | ITGA1 | Imputed   | T/C                 | 0.20 | 0.70 (0.54-0.91)         | 0.008          | 0.065             | --                   | 7                       |
| rs2456206   | 5    | 52179119  | ITGA1 | Genotyped | C/T                 | 0.20 | 0.71 (0.55-0.92)         | 0.009          | 0.077             | --                   | 6                       |
| rs2447863   | 5    | 52179151  | ITGA1 | Imputed   | T/A                 | 0.20 | 0.70 (0.54-0.91)         | 0.008          | 0.065             | --                   | 7                       |
| rs12520768  | 5    | 52179298  | ITGA1 | Imputed   | C/A                 | 0.31 | 1.31 (1.07-1.60)         | 0.008          | 0.064             | --                   | 6                       |
| rs2456205   | 5    | 52179458  | ITGA1 | Imputed   | G/T                 | 0.21 | 0.70 (0.54-0.91)         | 0.006          | 0.054             | --                   | 7                       |
| rs2456204   | 5    | 52179477  | ITGA1 | Imputed   | C/T                 | 0.20 | 0.71 (0.54-0.92)         | 0.009          | 0.074             | --                   | 7                       |
| rs2456203   | 5    | 52179790  | ITGA1 | Imputed   | T/C                 | 0.20 | 0.70 (0.54-0.91)         | 0.008          | 0.065             | --                   | 7                       |
| rs2456202   | 5    | 52179825  | ITGA1 | Imputed   | T/A                 | 0.20 | 0.70 (0.54-0.91)         | 0.008          | 0.065             | --                   | 7                       |
| rs2447864   | 5    | 52179868  | ITGA1 | Imputed   | C/T                 | 0.20 | 0.70 (0.54-0.91)         | 0.008          | 0.065             | --                   | 6                       |
| rs2456201   | 5    | 52180012  | ITGA1 | Imputed   | G/A                 | 0.20 | 0.69 (0.53-0.90)         | 0.006          | 0.053             | --                   | 6                       |
| rs72756569  | 5    | 52181931  | ITGA1 | Imputed   | T/A                 | 0.15 | 1.39 (1.1-1.76)          | 0.007          | 0.057             | --                   | 5                       |
| rs2456199   | 5    | 52182162  | ITGA1 | Imputed   | C/T                 | 0.20 | 0.70 (0.54-0.91)         | 0.008          | 0.067             | --                   | 5                       |
| rs2447866   | 5    | 52182593  | ITGA1 | Imputed   | C/G                 | 0.20 | 0.70 (0.54-0.91)         | 0.008          | 0.067             | --                   | 5                       |
| rs10940277  | 5    | 52184613  | ITGA1 | Genotyped | T/C                 | 0.33 | 1.26 (1.03-1.54)         | 0.027          | 0.198             | --                   | 7                       |
| rs13357233  | 5    | 52184782  | ITGA1 | Imputed   | T/G                 | 0.15 | 1.44 (1.14-1.83)         | 0.002          | 0.022             | --                   | 7                       |
| rs13356806  | 5    | 52184903  | ITGA1 | Imputed   | A/G                 | 0.33 | 1.26 (1.03-1.54)         | 0.025          | 0.186             | --                   | 7                       |
| rs13356826  | 5    | 52184994  | ITGA1 | Imputed   | A/G                 | 0.33 | 1.27 (1.04-1.55)         | 0.021          | 0.160             | --                   | 6                       |
| rs6870949   | 5    | 52186515  | ITGA1 | Imputed   | T/C                 | 0.22 | 1.29 (1.04-1.60)         | 0.022          | 0.163             | --                   | 6                       |
| rs17829997  | 5    | 52193518  | ITGA1 | Imputed   | A/C                 | 0.22 | 1.28 (1.03-1.59)         | 0.024          | 0.177             | --                   | 7                       |
| rs1363191   | 5    | 52239947  | ITGA1 | Imputed   | C/G                 | 0.12 | 0.66 (0.47-0.93)         | 0.016          | 0.132             | --                   | 5                       |
| rs1363190   | 5    | 52239966  | ITGA1 | Imputed   | C/T                 | 0.12 | 0.66 (0.47-0.93)         | 0.016          | 0.132             | --                   | 7                       |
| rs11238354  | 7    | 55227064  | MET   | Imputed   | T/C                 | 0.27 | 0.78 (0.62-0.97)         | 0.027          | 0.197             | --                   | 5                       |
| rs1468727   | 7    | 55230105  | MET   | Genotyped | G/A                 | 0.25 | 0.76 (0.60-0.95)         | 0.017          | 0.135             | --                   | 5                       |
| rs2237708   | 7    | 116336880 | MET   | Imputed   | T/C                 | 0.25 | 1.28 (1.03-1.58)         | 0.027          | 0.196             | --                   | 5                       |
| rs10223961  | 7    | 116336948 | MET   | Imputed   | G/A                 | 0.25 | 1.28 (1.03-1.58)         | 0.027          | 0.196             | --                   | 4                       |
| rs2237709   | 7    | 116337144 | MET   | Imputed   | G/A                 | 0.25 | 1.28 (1.03-1.58)         | 0.027          | 0.196             | --                   | 5                       |
| rs2237710   | 7    | 116337352 | MET   | Imputed   | T/G                 | 0.28 | 1.26 (1.03-1.55)         | 0.025          | 0.183             | --                   | 6                       |
| rs35212357  | 7    | 116340531 | MET   | Imputed   | A/AT                | 0.25 | 1.28 (1.03-1.58)         | 0.027          | 0.196             | --                   | 6                       |
| rs17138937  | 7    | 116340582 | MET   | Imputed   | A/C                 | 0.25 | 1.28 (1.03-1.58)         | 0.027          | 0.196             | --                   | 6                       |

|            |    |           |                |           |        |      |                  |       |       |          |    |
|------------|----|-----------|----------------|-----------|--------|------|------------------|-------|-------|----------|----|
| rs2299436  | 7  | 116341383 | <i>MET</i>     | Genotyped | T/C    | 0.25 | 1.28 (1.03-1.58) | 0.027 | 0.196 | --       | 7  |
| rs2299437  | 7  | 116341488 | <i>MET</i>     | Genotyped | C/T    | 0.25 | 1.28 (1.03-1.58) | 0.027 | 0.196 | --       | 6  |
| rs2299438  | 7  | 116341754 | <i>MET</i>     | Imputed   | T/G    | 0.25 | 1.28 (1.03-1.58) | 0.027 | 0.196 | --       | 6  |
| rs10248537 | 7  | 116342627 | <i>MET</i>     | Imputed   | G/T    | 0.25 | 1.28 (1.03-1.58) | 0.027 | 0.196 | --       | 5  |
| rs35487584 | 7  | 116344693 | <i>MET</i>     | Imputed   | T/A/T  | 0.24 | 1.28 (1.03-1.59) | 0.026 | 0.190 | --       | 6  |
| rs10234854 | 7  | 116344711 | <i>MET</i>     | Imputed   | G/A    | 0.24 | 1.28 (1.03-1.59) | 0.026 | 0.188 | --       | 7  |
| rs8187909  | 9  | 75549857  | <i>ALDH1A1</i> | Imputed   | A/ACTG | 0.43 | 0.79 (0.65-0.97) | 0.024 | 0.178 | --       | 6  |
| rs7027604  | 9  | 75554952  | <i>ALDH1A1</i> | Genotyped | G/T    | 0.42 | 0.79 (0.65-0.96) | 0.019 | 0.149 | --       | 5  |
| rs3909559  | 9  | 75559569  | <i>ALDH1A1</i> | Imputed   | G/T    | 0.40 | 0.80 (0.66-0.97) | 0.026 | 0.190 | --       | 6  |
| rs10827164 | 10 | 33232628  | <i>ITGB1</i>   | Genotyped | A/G    | 0.36 | 1.25 (1.03-1.51) | 0.023 | 0.173 | --       | 3a |
| rs10768114 | 11 | 35222083  | <i>CD44</i>    | Imputed   | G/T    | 0.31 | 1.28 (1.04-1.58) | 0.018 | 0.140 | --       | 5  |
| rs11033025 | 11 | 35223158  | <i>CD44</i>    | Imputed   | C/T    | 0.31 | 1.28 (1.04-1.58) | 0.018 | 0.140 | --       | 7  |
| rs9666607* | 11 | 35226155  | <i>CD44</i>    | Genotyped | C/T    | 0.31 | 1.28 (1.04-1.58) | 0.018 | 0.141 | Splicing | 5  |
| rs35597    | 16 | 16158034  | <i>ABCC1</i>   | Genotyped | C/T    | 0.48 | 1.32 (1.08-1.60) | 0.005 | 0.046 | --       | 6  |
| rs35601    | 16 | 16159751  | <i>ABCC1</i>   | Imputed   | T/C    | 0.16 | 0.69 (0.52-0.92) | 0.012 | 0.102 | --       | 6  |
| rs35602    | 16 | 16160638  | <i>ABCC1</i>   | Imputed   | G/A    | 0.16 | 0.71 (0.53-0.94) | 0.016 | 0.128 | --       | 6  |
| rs35603    | 16 | 16160958  | <i>ABCC1</i>   | Imputed   | T/C    | 0.16 | 0.71 (0.53-0.94) | 0.016 | 0.128 | --       | 5  |
| rs9932506  | 16 | 16161425  | <i>ABCC1</i>   | Imputed   | G/A    | 0.50 | 1.25 (1.03-1.51) | 0.027 | 0.193 | --       | 5  |
| rs35604*   | 16 | 16161976  | <i>ABCC1</i>   | Imputed   | A/G    | 0.16 | 0.71 (0.53-0.94) | 0.017 | 0.136 | --       | 1f |
| rs35605*   | 16 | 16162019  | <i>ABCC1</i>   | Imputed   | C/T    | 0.16 | 0.71 (0.53-0.94) | 0.018 | 0.138 | Splicing | 1f |
| rs35607*   | 16 | 16162480  | <i>ABCC1</i>   | Genotyped | A/G    | 0.16 | 0.71 (0.54-0.95) | 0.020 | 0.152 | --       | 1f |
| rs35610*   | 16 | 16163273  | <i>ABCC1</i>   | Genotyped | G/T    | 0.16 | 0.72 (0.54-0.96) | 0.023 | 0.172 | --       | 1f |
| rs35611    | 16 | 16163600  | <i>ABCC1</i>   | Imputed   | A/G    | 0.16 | 0.71 (0.53-0.94) | 0.018 | 0.143 | --       | 6  |
| rs35612    | 16 | 16163744  | <i>ABCC1</i>   | Imputed   | G/A    | 0.16 | 0.71 (0.53-0.94) | 0.018 | 0.143 | --       | 6  |
| rs35613*   | 16 | 16164065  | <i>ABCC1</i>   | Imputed   | C/A    | 0.15 | 0.69 (0.51-0.93) | 0.014 | 0.111 | --       | 1f |
| rs35614    | 16 | 16164100  | <i>ABCC1</i>   | Imputed   | C/T    | 0.15 | 0.69 (0.51-0.93) | 0.015 | 0.118 | --       | 5  |
| rs35615    | 16 | 16164980  | <i>ABCC1</i>   | Imputed   | G/A    | 0.16 | 0.68 (0.51-0.91) | 0.009 | 0.077 | --       | 7  |
| rs35616    | 16 | 16165098  | <i>ABCC1</i>   | Imputed   | C/T    | 0.16 | 0.69 (0.51-0.92) | 0.011 | 0.093 | --       | 6  |
| rs35619    | 16 | 16166417  | <i>ABCC1</i>   | Imputed   | A/G    | 0.16 | 0.69 (0.51-0.92) | 0.011 | 0.093 | --       | 6  |
| rs35620    | 16 | 16168340  | <i>ABCC1</i>   | Imputed   | C/G    | 0.16 | 0.69 (0.51-0.92) | 0.011 | 0.095 | --       | 4  |
| rs35624    | 16 | 16169490  | <i>ABCC1</i>   | Imputed   | A/G    | 0.16 | 0.71 (0.53-0.94) | 0.018 | 0.139 | --       | 4  |
| rs4781724  | 16 | 16173926  | <i>ABCC1</i>   | Imputed   | C/T    | 0.46 | 0.80 (0.65-0.97) | 0.022 | 0.166 | --       | 6  |
| rs4148354  | 16 | 16174506  | <i>ABCC1</i>   | Genotyped | T/C    | 0.46 | 0.80 (0.66-0.97) | 0.023 | 0.169 | --       | 2b |
| rs3072717  | 16 | 16174736  | <i>ABCC1</i>   | Imputed   | GTTT/G | 0.15 | 0.71 (0.53-0.96) | 0.025 | 0.188 | --       | 5  |
| rs11430158 | 16 | 16176423  | <i>ABCC1</i>   | Imputed   | CT/C   | 0.15 | 0.70 (0.52-0.94) | 0.018 | 0.141 | --       | 5  |
| rs6498598  | 16 | 16176711  | <i>ABCC1</i>   | Imputed   | C/T    | 0.15 | 0.70 (0.52-0.94) | 0.018 | 0.141 | --       | 7  |
| rs6498599  | 16 | 16176756  | <i>ABCC1</i>   | Imputed   | C/T    | 0.15 | 0.70 (0.52-0.94) | 0.018 | 0.141 | --       | 7  |
| rs7185286  | 16 | 16176845  | <i>ABCC1</i>   | Imputed   | C/T    | 0.15 | 0.70 (0.52-0.94) | 0.018 | 0.139 | --       | 5  |
| rs11075295 | 16 | 16177687  | <i>ABCC1</i>   | Genotyped | T/C    | 0.14 | 0.70 (0.52-0.94) | 0.019 | 0.150 | --       | 3a |
| rs3851709  | 16 | 16182169  | <i>ABCC1</i>   | Imputed   | G/A    | 0.15 | 0.71 (0.53-0.96) | 0.024 | 0.179 | --       | 7  |
| rs3851710  | 16 | 16183005  | <i>ABCC1</i>   | Imputed   | A/G    | 0.46 | 0.80 (0.65-0.97) | 0.022 | 0.165 | --       | 2b |
| rs3851711  | 16 | 16183087  | <i>ABCC1</i>   | Imputed   | T/C    | 0.46 | 0.80 (0.66-0.97) | 0.023 | 0.170 | --       | 4  |
| rs3851712  | 16 | 16183219  | <i>ABCC1</i>   | Imputed   | T/C    | 0.46 | 0.80 (0.66-0.97) | 0.023 | 0.170 | --       | 5  |
| rs2074087  | 16 | 16184232  | <i>ABCC1</i>   | Imputed   | G/C    | 0.15 | 0.70 (0.52-0.94) | 0.018 | 0.141 | --       | 3a |
| rs13332140 | 16 | 16186020  | <i>ABCC1</i>   | Imputed   | G/T    | 0.46 | 0.79 (0.65-0.96) | 0.019 | 0.147 | --       | 5  |

|             |    |          |       |           |             |      |                  |       |       |       |    |
|-------------|----|----------|-------|-----------|-------------|------|------------------|-------|-------|-------|----|
| rs4148359   | 16 | 16187234 | ABCC1 | Imputed   | C/G         | 0.46 | 0.79 (0.65-0.97) | 0.021 | 0.160 | --    | 2b |
| rs4148361   | 16 | 16187469 | ABCC1 | Imputed   | T/C         | 0.46 | 0.79 (0.65-0.96) | 0.020 | 0.150 | --    | 5  |
| rs11427239  | 16 | 16188380 | ABCC1 | Imputed   | CT/C        | 0.15 | 0.70 (0.52-0.95) | 0.021 | 0.162 | --    | 6  |
| rs3932161   | 16 | 16188763 | ABCC1 | Imputed   | T/C         | 0.46 | 0.79 (0.65-0.96) | 0.018 | 0.140 | --    | 6  |
| rs11640751  | 16 | 16189268 | ABCC1 | Imputed   | G/A         | 0.46 | 0.79 (0.65-0.96) | 0.018 | 0.140 | --    | 5  |
| rs3851714   | 16 | 16189404 | ABCC1 | Imputed   | C/T         | 0.15 | 0.70 (0.52-0.95) | 0.022 | 0.167 | --    | 5  |
| rs3851715   | 16 | 16189426 | ABCC1 | Imputed   | T/C         | 0.15 | 0.70 (0.52-0.95) | 0.022 | 0.167 | --    | 5  |
| rs35006643  | 16 | 16190083 | ABCC1 | Imputed   | C/CA        | 0.15 | 0.71 (0.53-0.95) | 0.023 | 0.172 | --    | 3a |
| rs5016527   | 16 | 16191285 | ABCC1 | Imputed   | C/T         | 0.43 | 0.79 (0.64-0.96) | 0.020 | 0.155 | --    | 5  |
| rs2239996   | 16 | 16193160 | ABCC1 | Imputed   | A/G         | 0.46 | 0.79 (0.65-0.96) | 0.019 | 0.148 | --    | 7  |
| rs2283515   | 16 | 16193603 | ABCC1 | Imputed   | T/G         | 0.44 | 0.79 (0.65-0.97) | 0.021 | 0.161 | --    | 6  |
| rs12708802  | 16 | 16195138 | ABCC1 | Imputed   | T/G         | 0.44 | 0.80 (0.66-0.98) | 0.027 | 0.196 | --    | 6  |
| rs4148366   | 16 | 16195565 | ABCC1 | Imputed   | G/A         | 0.44 | 0.80 (0.66-0.98) | 0.028 | 0.200 | --    | 2b |
| rs12596469  | 16 | 16198604 | ABCC1 | Imputed   | T/C         | 0.43 | 0.78 (0.63-0.95) | 0.014 | 0.110 | --    | 5  |
| rs7196296   | 16 | 16198834 | ABCC1 | Imputed   | G/C         | 0.16 | 0.68 (0.51-0.92) | 0.013 | 0.108 | --    | 5  |
| rs4148371   | 16 | 16201608 | ABCC1 | Imputed   | G/A         | 0.24 | 0.71 (0.55-0.90) | 0.006 | 0.049 | --    | 5  |
| rs11864374  | 16 | 16201885 | ABCC1 | Genotyped | C/T         | 0.24 | 0.70 (0.55-0.90) | 0.005 | 0.045 | --    | 5  |
| rs368567370 | 16 | 16202118 | ABCC1 | Imputed   | GTTTC/G     | 0.21 | 0.66 (0.50-0.86) | 0.002 | 0.021 | --    | 6  |
| rs35193854  | 16 | 16202300 | ABCC1 | Imputed   | G/GT        | 0.21 | 0.67 (0.51-0.87) | 0.003 | 0.026 | --    | 7  |
| rs212082    | 16 | 16227147 | ABCC1 | Imputed   | A/G         | 0.18 | 0.60 (0.45-0.80) | 0.001 | 0.005 | --    | 3b |
| rs10638507  | 16 | 16227229 | ABCC1 | Imputed   | TTTTTTG/T   | 0.40 | 0.76 (0.62-0.94) | 0.012 | 0.100 | --    | 5  |
| rs150530    | 16 | 16227589 | ABCC1 | Imputed   | C/T         | 0.18 | 0.60 (0.46-0.80) | 0.000 | 0.005 | --    | 5  |
| rs212083    | 16 | 16227943 | ABCC1 | Genotyped | G/A         | 0.18 | 0.62 (0.47-0.82) | 0.001 | 0.009 | --    | 4  |
| rs212086    | 16 | 16229735 | ABCC1 | Imputed   | C/T         | 0.18 | 0.60 (0.46-0.80) | 0.000 | 0.005 | --    | 5  |
| rs143814492 | 16 | 16231523 | ABCC1 | Imputed   | C/CCTCTGCCT | 0.16 | 0.60 (0.44-0.81) | 0.001 | 0.009 | --    | 7  |
| rs144317862 | 16 | 16231729 | ABCC1 | Imputed   | A/AT        | 0.16 | 0.61 (0.45-0.82) | 0.001 | 0.012 | --    | 5  |
| rs212088    | 16 | 16232433 | ABCC1 | Imputed   | G/A         | 0.17 | 0.56 (0.42-0.76) | 0.000 | 0.002 | --    | 7  |
| rs212089    | 16 | 16232607 | ABCC1 | Imputed   | T/C         | 0.17 | 0.56 (0.42-0.76) | 0.000 | 0.002 | --    | 5  |
| rs212091*   | 16 | 16236650 | ABCC1 | Imputed   | T/C         | 0.15 | 0.58 (0.43-0.80) | 0.001 | 0.009 | miRNA | 7  |
| rs212094    | 16 | 16238584 | ABCC1 | Imputed   | G/A         | 0.14 | 0.58 (0.42-0.80) | 0.001 | 0.009 | --    | 4  |
| rs75347775  | 19 | 18495908 | GDF15 | Imputed   | G/A         | 0.25 | 1.31 (1.06-1.61) | 0.011 | 0.091 | --    | 5  |
| rs1058587*  | 19 | 18499422 | GDF15 | Imputed   | C/G         | 0.26 | 1.29 (1.05-1.59) | 0.015 | 0.117 | nsSNP | 4  |
| rs16982345* | 19 | 18500722 | GDF15 | Genotyped | C/T         | 0.26 | 1.29 (1.05-1.59) | 0.016 | 0.127 | --    | 1f |
| rs62217465  | 21 | 39950577 | ERG   | Imputed   | C/G         | 0.10 | 1.45 (1.09-1.93) | 0.011 | 0.088 | --    | 5  |
| rs6517472   | 21 | 39953486 | ERG   | Imputed   | T/C         | 0.11 | 1.46 (1.12-1.89) | 0.005 | 0.045 | --    | 7  |
| rs9305654   | 21 | 39955253 | ERG   | Imputed   | G/A         | 0.36 | 1.27 (1.05-1.54) | 0.014 | 0.114 | --    | 7  |
| rs34356676  | 21 | 39955412 | ERG   | Imputed   | T/TC        | 0.36 | 1.27 (1.05-1.54) | 0.013 | 0.104 | --    | 7  |
| rs2836542   | 21 | 39955438 | ERG   | Genotyped | G/T         | 0.36 | 1.27 (1.05-1.53) | 0.015 | 0.122 | --    | 6  |
| rs2836543   | 21 | 39955464 | ERG   | Imputed   | T/C         | 0.36 | 1.27 (1.05-1.54) | 0.013 | 0.104 | --    | 6  |
| rs2836551   | 21 | 39972377 | ERG   | Imputed   | T/C         | 0.43 | 0.79 (0.65-0.97) | 0.023 | 0.173 | --    | 5  |
| rs386076    | 21 | 39974159 | ERG   | Imputed   | G/C         | 0.43 | 0.79 (0.65-0.97) | 0.022 | 0.165 | --    | 6  |

Abbreviations: SNP: Single nucleotide polymorphism; G/I: Genotyped/imputed; EAF: Effect allele frequency; HR: Hazards ratio; CI: Confidence interval; FPRP: False positive report probability.

\* Nine functional SNPs: rs9666607, rs35604, rs35605, rs35607, rs35610, rs35613, rs212091, rs1058587 and rs16982345.

<sup>a</sup> Reference/effect allele.

<sup>b</sup> Multivariate cox regression analyses were adjusted for age, Gleason score, stage, and primary treatment.

<sup>c</sup> SNPinfo, <http://snpinfo.niehs.nih.gov/snpinfo/snpfunc.htm>.

<sup>d</sup> RegulomeDB, <http://regulome.stanford.edu/>. SNPs with predicted scores of "1" were considered as functional.

**Supplementary Table S5:** The four independent and significant SNPs and overall survival of prostate cancer patients in various genetic models.

| SNP                        | Genotype                 | Frequency |            | Multivariate analysis <sup>a</sup> |       |
|----------------------------|--------------------------|-----------|------------|------------------------------------|-------|
|                            |                          | All       | Deaths (%) | HR (95% CI)                        | P     |
| <i>CD44</i> rs9666607 G>A  | GG                       | 547       | 95 (17.4)  | 1.00                               |       |
|                            | AG                       | 493       | 95 (18.7)  | 1.08 (0.81-1.44)                   | 0.621 |
|                            | AA                       | 109       | 28 (25.7)  | 1.93 (1.26-2.95)                   | 0.002 |
|                            | Trend                    |           |            |                                    | 0.018 |
|                            | AA+AG vs. GG             | 602       | 120 (19.9) | 1.20 (0.92-1.58)                   | 0.183 |
|                            | AA vs. GG+AG             | 109       | 28 (25.7)  | 1.86 (1.25-2.78)                   | 0.002 |
|                            | <i>ABCC1</i> rs35605 C>T | CC        | 811        | 164 (20.2)                         | 1.00  |
| TC                         |                          | 304       | 48 (15.8)  | 0.75 (0.54-1.04)                   | 0.09  |
| TT                         |                          | 32        | 3 (9.4)    | 0.35 (0.11-1.13)                   | 0.079 |
| Trend                      |                          |           |            |                                    | 0.018 |
| TC+TT vs. CC               |                          | 811       | 51 (15.2)  | 0.71 (0.51-0.97)                   | 0.034 |
| TT vs. CC+TC               |                          | 32        | 3 (9.4)    | 0.38 (0.12-1.21)                   | 0.101 |
| <i>ABCC1</i> rs212091 T>C  |                          | TT        | 824        | 167 (20.3)                         | 1.00  |
|                            | TC                       | 290       | 46 (15.9)  | 0.65 (0.47-0.91)                   | 0.013 |
|                            | CC                       | 21        | 0          | --                                 | --    |
|                            | Trend                    |           |            |                                    | 0.001 |
|                            | TC+CC vs. TT             | 311       | 46 (14.8)  | 0.60 (0.43-0.84)                   | 0.003 |
| <i>GDF15</i> rs1058587 C>G | CC                       | 635       | 114 (18.0) | 1.00                               |       |
|                            | CG                       | 428       | 78 (18.2)  | 1.18 (0.88-1.58)                   | 0.278 |
|                            | GG                       | 82        | 22 (26.8)  | 1.87 (1.18-2.96)                   | 0.007 |
|                            | Trend                    |           |            |                                    | 0.015 |
|                            | CG+GG vs. CC             | 510       | 100 (19.6) | 1.28 (0.98-1.69)                   | 0.072 |
|                            | GG vs. CG+GG             | 82        | 22 (26.8)  | 1.76 (1.13-2.74)                   | 0.013 |

Abbreviations: SNP: Single nucleotide polymorphism; HR: Hazards ratio; CI: Confidence interval;

<sup>a</sup> Multivariate cox regression analyses were adjusted for age, Gleason score, stage and primary treatments.



**Supplementary Table S6:** Associations of the four SNPs and overall survival and disease specific survival in prostate cancer patients.

| SNP       | Gene         | Allele <sup>a</sup> | Frequency <sup>b</sup> |                     |                         | Overall Survival        |                |                     | Disease Specific Survival |                         |                |  |
|-----------|--------------|---------------------|------------------------|---------------------|-------------------------|-------------------------|----------------|---------------------|---------------------------|-------------------------|----------------|--|
|           |              |                     | All <sup>b</sup>       | Deaths <sup>b</sup> | Deaths (%) <sup>b</sup> | HR (95%CI) <sup>c</sup> | P <sup>c</sup> | Deaths <sup>d</sup> | Deaths (%) <sup>d</sup>   | HR (95%CI) <sup>d</sup> | P <sup>d</sup> |  |
| rs9666607 | <i>CD44</i>  | G/A                 | 547/493/109            | 95/95/28            | 17.4/18.7/25.7          | 1.28<br>(1.04-1.58)     | 0.018          | 27/26/6             | 4.9/5.3/5.5               | 1.01<br>(0.64-1.61)     | 0.954          |  |
| rs35605   | <i>ABCC1</i> | C/T                 | 811/304/32             | 164/48/3            | 20.2/15.8/9.4           | 0.71<br>(0.53-0.94)     | 0.018          | 40/19/0             | 4.9/6.3/0                 | 0.9<br>(0.56-1.43)      | 0.647          |  |
| rs212091  | <i>ABCC1</i> | T/C                 | 824/290/21             | 167/46/0            | 20.3/15.9/0             | 0.58<br>(0.43-0.80)     | 0.001          | 44/14/0             | 5.3/4.8/0                 | 0.67<br>(0.38-1.18)     | 0.169          |  |
| rs1058587 | <i>GDF15</i> | C/G                 | 635/428/82             | 114/78/22           | 18.0/18.2/26.8          | 1.29<br>(1.05-1.59)     | 0.015          | 37/17/5             | 5.8/4.0/6.1               | 0.96<br>(0.61-1.52)     | 0.854          |  |

Abbreviations: EAF: Effect allele frequency; HR: Hazard ratio; CI: Confidence interval;

<sup>a</sup> Reference/effect allele;

<sup>b</sup> Major homozygote/heterozygote/rare homozygote;

<sup>c</sup> Multivariate cox regression analyses were adjusted for age, Gleason score, stage and primary treatments.

<sup>d</sup> Cox regression competing risk analyses (Fine and Gray's) took prostate cancer specific deaths as the event of interest and other deaths as the competing event . The analyses were adjusted for age, Gleason score, stage, and primary treatments.

**Supplementary Table S7:** Combined analysis of the four independent and significant SNPs.

| Number of risk alleles <sup>a</sup> | Frequency |                      | Multivariate analysis <sup>b</sup> |          | AIC <sup>c</sup> |      |
|-------------------------------------|-----------|----------------------|------------------------------------|----------|------------------|------|
|                                     | All       | Deaths (%)           | HR (95% CI)                        | P        |                  |      |
| 1-2                                 | 46        | 2 (4.3) <sup>d</sup> | 1.00                               |          |                  |      |
| 3                                   | 158       | 19 (12.0)            | 4.85 (1.11-21.17)                  | 0.036    |                  |      |
| 4                                   | 365       | 70 (19.2)            | 8.10 (1.96-33.50)                  | 0.004    |                  |      |
| 5                                   | 344       | 68 (19.8)            | 8.77 (2.12-36.33)                  | 0.003    |                  |      |
| 6                                   | 158       | 40 (25.3)            | 11.20 (2.68-46.86)                 | 9.42E-04 |                  |      |
| 7                                   | 47        | 11 (23.4)            | 14.64 (3.18-67.52)                 | 5.78E-04 |                  |      |
| 8                                   | 8         | 2 (25.0)             | 14.86 (2.06-107.04)                | 0.007    |                  | com0 |
| Trend                               |           |                      |                                    | 1.08E-06 | 2670.10          |      |
| 1-2                                 | 46        | 2 (4.3) <sup>d</sup> | 1.00                               |          |                  |      |
| 3                                   | 158       | 19 (12.0)            | 4.82 (1.10-21.02)                  | 0.036    |                  | com1 |
| 4                                   | 365       | 70 (19.2)            | 8.05 (1.95-33.27)                  | 0.004    |                  |      |
| 5                                   | 344       | 68 (19.8)            | 8.70 (2.10-36.03)                  | 0.003    |                  |      |
| 6-8                                 | 213       | 53 (24.9)            | 11.81 (2.84-49.08)                 | 6.81E-04 |                  |      |
| Trend                               |           |                      |                                    | 1.83E-06 | 2669.93          |      |
| 1-2                                 | 46        | 2 (4.3) <sup>d</sup> | 1.00                               |          |                  | com3 |
| 3-5                                 | 867       | 157 (18.1)           | 7.70 (1.84-31.48)                  | 0.005    |                  |      |
| 6-8                                 | 213       | 53 (24.9)            | 11.85 (2.85-49.22)                 | 6.70E-04 |                  |      |
| Trend                               |           |                      |                                    | 5.30E-07 | 2675.33          |      |
| 1-3                                 | 204       | 21 (10.3)            | 1.00                               |          |                  |      |
| 4-5                                 | 709       | 138 (19.5)           | 2.35 (1.47-3.75)                   | 3.61E-04 |                  | com4 |
| 6-8                                 | 213       | 53 (24.9)            | 3.32 (1.99-5.53)                   | 4.35E-06 |                  |      |
| Trend                               |           |                      |                                    | 2.76E-06 | 2671.70          |      |

Abbreviations: SNP: Single nucleotide polymorphism; HR: Hazards ratio; CI: Confidence interval; AIC, Akaike information criterion.

<sup>a</sup> Risk alleles were rs9666607 A, rs35605 C, rs212091 T and rs1058587 G;

<sup>b</sup> Multivariate cox regression analyses were adjusted for age, Gleason score, stage, and primary treatments;

<sup>c</sup> AIC in the trend model of multivariate cox regression analyses;

<sup>d</sup> Two patients reached the endpoint were both with two risk alleles.

**Supplementary Table S8:** Stratified association analyses on the combined risk alleles.

| Characteristics                  | 1-2 risk alleles <sup>a</sup> |            | 3 risk alleles <sup>a</sup> |            | 4-5 risk alleles <sup>a</sup> |            | 6-8 risk alleles <sup>a</sup> |            | Multivariate analysis <sup>b</sup> |          | <i>P</i> <sub>heterogeneity</sub> |
|----------------------------------|-------------------------------|------------|-----------------------------|------------|-------------------------------|------------|-------------------------------|------------|------------------------------------|----------|-----------------------------------|
|                                  | All                           | Deaths (%) | All                         | Deaths (%) | All                           | Deaths (%) | All                           | Deaths (%) | HR (95% CI)                        | <i>P</i> |                                   |
| Age (years)                      |                               |            |                             |            |                               |            |                               |            |                                    |          |                                   |
| < 67                             | 15                            | 0          | 81                          | 9 (11.1)   | 321                           | 40 (12.5)  | 118                           | 21 (17.8)  | 1.31 (0.90-1.91)                   | 0.159    | 0.104                             |
| ≥ 67                             | 31                            | 2 (6.5)    | 77                          | 10 (13.0)  | 388                           | 98 (25.3)  | 95                            | 32 (33.7)  | 1.91 (1.48-2.46)                   | <0.001   |                                   |
| PSA before diagnosis (ng/ml)     |                               |            |                             |            |                               |            |                               |            |                                    |          |                                   |
| < 6.1                            | 19                            | 1 (5.3)    | 63                          | 4 (6.35)   | 362                           | 60 (16.6)  | 114                           | 22 (19.3)  | 1.64 (1.18-2.28)                   | 0.003    | 0.867                             |
| ≥ 6.1                            | 27                            | 1 (3.7)    | 95                          | 15 (15.8)  | 347                           | 78 (22.5)  | 99                            | 31 (31.3)  | 1.70 (1.31-2.21)                   | <0.001   |                                   |
| Gleason score                    |                               |            |                             |            |                               |            |                               |            |                                    |          |                                   |
| ≤ 6                              | 21                            | 0          | 81                          | 6 (7.4)    | 346                           | 66 (19.1)  | 111                           | 22 (19.8)  | 2.00 (1.44-2.79)                   | <0.001   | 0.838                             |
| = 7                              | 18                            | 0          | 62                          | 8 (12.9)   | 289                           | 45 (15.6)  | 81                            | 22 (27.2)  | 1.72 (1.09-2.72)                   | 0.021    |                                   |
| ≥ 8                              | 7                             | 2 (28.6)   | 15                          | 5 (33.3)   | 69                            | 25 (35.23) | 21                            | 9 (42.9)   | 1.78 (1.24-2.57)                   | 0.002    |                                   |
| Stage                            |                               |            |                             |            |                               |            |                               |            |                                    |          |                                   |
| I/II                             | 38                            | 1 (2.6)    | 119                         | 8 (6.7)    | 568                           | 101 (17.8) | 169                           | 40 (23.7)  | 1.86 (1.44-2.41)                   | <0.001   | 0.136                             |
| III/IV                           | 8                             | 1 (12.5)   | 39                          | 11 (28.2)  | 141                           | 37 (26.2)  | 44                            | 13 (30.0)  | 1.32 (0.91-1.91)                   | 0.141    |                                   |
| Aggressiveness <sup>c</sup>      |                               |            |                             |            |                               |            |                               |            |                                    |          |                                   |
| Non-aggressive                   | 16                            | 0          | 72                          | 3 (4.2)    | 297                           | 54 (18.2)  | 97                            | 19 (19.6)  | 1.98 (1.36-2.86)                   | <0.001   | 0.280                             |
| Aggressive                       | 30                            | 2 (6.7)    | 86                          | 16 (18.6)  | 410                           | 84 (20.5)  | 116                           | 34 (29.3)  | 1.55 (1.21-1.97)                   | <0.001   |                                   |
| Types of treatments              |                               |            |                             |            |                               |            |                               |            |                                    |          |                                   |
| Radical prostatectomy            | 21                            | 0          | 97                          | 8 (8.3)    | 353                           | 44 (12.5)  | 128                           | 23 (18.0)  | 1.75 (1.22-2.50)                   | 0.002    | 0.196                             |
| Radiotherapy alone               | 7                             | 1 (14.3)   | 19                          | 1 (5.3)    | 135                           | 35 (25.9)  | 29                            | 7 (24.1)   | 1.39 (0.87-2.24)                   | 0.173    |                                   |
| Radiotherapy + endocrine therapy | 9                             | 0          | 26                          | 5 (19.2)   | 134                           | 27 (20.2)  | 30                            | 7 (23.3)   | 1.34 (0.80-2.26)                   | 0.265    |                                   |
| Endocrine therapy alone          | 8                             | 1 (12.5)   | 5                           | 5 (100.0)  | 32                            | 18 (56.3)  | 8                             | 5 (62.5)   | 1.61 (1.03-2.49)                   | 0.035    |                                   |
| Other treatments                 | 1                             | 0          | 11                          | 0          | 55                            | 14 (25.5)  | 18                            | 11 (61.1)  | 3.90 (1.81-8.41)                   | <0.001   |                                   |

Abbreviations: HR: Hazards ratio; CI: Confidence interval;

<sup>a</sup> Risk alleles were rs9666607 A, rs35605 C, rs212091 T and rs1058587 G;

<sup>b</sup> Multivariate cox regression analyses in the trend model were adjusted for age, Gleason score, stage, and primary treatment when appropriate;

<sup>c</sup> Non-aggressive: cases with a Gleason score <7 and stage < III; Aggressive: cases with a Gleason score ≥ 7 or stage ≥ III.

**Supplementary Table S9:** Stratified association analyses of the four independent and significant SNPs.

| Characteristics              | rs966607 G>A             |                |                | rs35605 C>T              |                |                | rs212091 T>C             |                |                | rs1058587 C>G            |                |                |
|------------------------------|--------------------------|----------------|----------------|--------------------------|----------------|----------------|--------------------------|----------------|----------------|--------------------------|----------------|----------------|
|                              | HR (95% CI) <sup>a</sup> | P <sup>a</sup> | P <sup>b</sup> | HR (95% CI) <sup>a</sup> | P <sup>a</sup> | P <sup>b</sup> | HR (95% CI) <sup>a</sup> | P <sup>a</sup> | P <sup>b</sup> | HR (95% CI) <sup>a</sup> | P <sup>a</sup> | P <sup>b</sup> |
| Age (years)                  |                          |                |                |                          |                |                |                          |                |                |                          |                |                |
| < 67                         | 1.24 (0.87-1.77)         | 0.225          | 0.915          | 0.88 (0.54-1.42)         | 0.588          | 0.297          | 0.99 (0.58-1.69)         | 0.978          | 0.017          | 1.10 (0.77-1.57)         | 0.612          | 0.235          |
| ≥ 67                         | 1.27 (0.98-1.65)         | 0.065          |                | 0.64 (0.45-0.91)         | 0.013          |                | 2.23 (1.49-3.33)         | <0.001         |                | 1.44 (1.10-1.87)         | 0.007          |                |
| PSA before diagnosis (ng/ml) |                          |                |                |                          |                |                |                          |                |                |                          |                |                |
| < 6.1                        | 1.35 (0.99-1.84)         | 0.062          | 0.524          | 0.84 (0.55-1.27)         | 0.403          | 0.278          | 0.58 (0.35-0.98)         | 0.041          | 0.986          | 1.30 (0.94-1.79)         | 0.109          | 0.972          |
| ≥ 6.1                        | 1.18 (0.90-1.56)         | 0.233          |                | 0.61 (0.41-0.91)         | 0.015          |                | 0.58 (0.39-1.87)         | 0.009          |                | 1.29 (0.98-1.70)         | 0.07           |                |
| Gleason score                |                          |                |                |                          |                |                |                          |                |                |                          |                |                |
| ≤ 6                          | 1.27 (0.93-1.72)         | 0.133          | 0.774          | 0.51 (0.32-0.82)         | 0.006          | 0.384          | 0.68 (0.42-1.09)         | 0.107          | 0.467          | 1.35 (0.99-1.84)         | 0.059          | 0.970          |
| = 7                          | 1.29 (0.92-1.81)         | 0.138          |                | 0.78 (0.49-1.25)         | 0.299          |                | 0.45 (0.25-0.79)         | 0.006          |                | 1.30 (0.91-1.86)         | 0.143          |                |
| ≥ 8                          | 1.60 (0.90-2.83)         | 0.107          |                | 0.78 (0.42-1.47)         | 0.449          |                | 0.73 (0.36-1.47)         | 0.374          |                | 1.26 (0.77-2.05)         | 0.365          |                |
| Stage                        |                          |                |                |                          |                |                |                          |                |                |                          |                |                |
| I/II                         | 1.33 (1.05-1.70)         | 0.019          | 0.468          | 0.62 (0.44-0.88)         | 0.007          | 0.102          | 0.66 (0.45-0.96)         | 0.030          | 0.504          | 1.37 (1.07-1.76)         | 0.012          | 0.289          |
| III/IV                       | 1.12 (0.75-1.66)         | 0.588          |                | 1.04 (0.62-1.73)         | 0.890          |                | 0.52 (0.29-0.94)         | 0.029          |                | 1.06 (0.71-1.59)         | 0.781          |                |
| Aggressiveness <sup>c</sup>  |                          |                |                |                          |                |                |                          |                |                |                          |                |                |
| Non-aggressive               | 1.42 (1.02-1.97)         | 0.036          | 0.458          | 0.47 (0.28-0.79)         | 0.005          | 0.05           | 0.83 (0.50-1.38)         | 0.472          | 0.138          | 1.28 (0.91-1.80)         | 0.156          | 1.000          |
| Aggressive                   | 1.21 (0.93-1.58)         | 0.151          |                | 0.87 (0.62-1.21)         | 0.396          |                | 0.51 (0.34-0.75)         | <0.001         |                | 1.28 (0.98-1.67)         | 0.065          |                |
| Types of treatments          |                          |                |                |                          |                |                |                          |                |                |                          |                |                |
| Radical prostatectomy        | 1.06 (0.74-1.50)         | 0.763          | 0.425          | 0.62 (0.36-1.05)         | 0.076          | 0.074          | 0.57 (0.33-0.99)         | 0.046          | 0.72           | 1.37 (0.97-1.94)         | 0.078          | 0.991          |
| Radiotherapy alone           | 1.23 (0.79-1.91)         | 0.370          |                | 1.19 (0.65-2.17)         | 0.569          |                | 0.68 (0.35-1.32)         | 0.245          |                | 1.21 (0.75-1.94)         | 0.43           |                |
| Radiotherapy+hormone therapy | 1.29 (0.77-2.15)         | 0.339          |                | 1.10 (0.62-1.95)         | 0.740          |                | 0.95 (0.45-1.32)         | 0.902          |                | 1.31 (0.77-2.22)         | 0.315          |                |
| Hormone therapy alone        | 1.63 (0.93-2.88)         | 0.091          |                | 0.51 (0.26-1.02)         | 0.056          |                | 0.54 (0.25-1.18)         | 0.123          |                | 1.32 (0.73-2.39)         | 0.351          |                |
| Other treatments             | 1.97 (1.09-3.55)         | 0.024          |                | 0.21 (0.05-0.94)         | 0.041          |                | 0.36 (0.08-1.59)         | 0.176          |                | 1.18 (0.67-2.09)         | 0.572          |                |

Abbreviations: SNP, single nucleotide polymorphism; HR: Hazards ratio; CI: Confidence interval;

<sup>a</sup> Multivariate cox regression analyses were adjusted for age, Gleason score, stage and primary treatment.

<sup>b</sup> P for heterogeneity.

<sup>c</sup> Non-aggressive: cases with a Gleason score <7 and stage < III; Aggressive: cases with a Gleason score ≥ 7 or stage ≥ III.

**Supplementary Table S10:** Summary of correlations between the four SNPs and mRNA expression from the HapMap3 Project.

| Reporter Name | Reporter Database Entry [RefSeq] | Gene         | SNP <sup>a</sup>         | All <sup>b</sup> |        |      |                         |                     |                   | CEU <sup>c</sup> |        |       |                         |                     |                   |
|---------------|----------------------------------|--------------|--------------------------|------------------|--------|------|-------------------------|---------------------|-------------------|------------------|--------|-------|-------------------------|---------------------|-------------------|
|               |                                  |              |                          | <i>P</i>         | Beta   | SE   | <i>P</i> <sub>adj</sub> | Beta <sub>adj</sub> | SE <sub>adj</sub> | <i>P</i>         | Beta   | SE    | <i>P</i> <sub>adj</sub> | Beta <sub>adj</sub> | SE <sub>adj</sub> |
| ILMN_1803429  | NP_001001389.1                   | <i>CD44</i>  | rs9666607 G>A            | 0.007            | 0.093  | 0.03 | 0.699                   | 0.013               | 0.034             | 0.349            | -0.074 | 0.078 | 0.514                   | -0.051              | 0.078             |
| ILMN_1732193  | NP_000601.3                      | <i>CD44</i>  | <b>rs9666607 G&gt;A*</b> | 0.007            | 0.057  | 0.02 | 0.016                   | 0.053               | 0.022             | 0.128            | -0.061 | 0.04  | 0.174                   | -0.055              | 0.04              |
| ILMN_1802404  | NP_063915.1                      | <i>ABCC1</i> | <b>rs35605 C&gt;T*</b>   | 0.019            | 0.056  | 0.02 | 0.100                   | 0.040               | 0.024             | 0.378            | -0.049 | 0.055 | 0.448                   | -0.042              | 0.056             |
|               |                                  |              | <b>rs212091 T&gt;C*</b>  | 0.014            | -0.062 | 0.03 | 0.007                   | -0.066              | 0.025             | 0.051            | -0.101 | 0.051 | 0.039                   | -0.107              | 0.051             |
| ILMN_1763658  | NP_004855.1                      | <i>GDF15</i> | <b>rs1058587 C&gt;G*</b> | 0.535            | -0.025 | 0.04 | 0.043                   | -0.081              | 0.04              | 0.303            | 0.122  | 0.118 | 0.291                   | 0.126               | 0.119             |

Abbreviations: SNP: single nucleotide polymorphism; SE: standard error; CEU: Utah Residents (CEPH) with Northern and Western Ancestry.

\*Figures of these four SNPs in all populations and CEU population were shown in Figure 3.

<sup>a</sup> Reference/effect allele. The genotypes of each SNP were coded as major homozygote/heterozygote/rare homozygote=0/1/2.

<sup>b</sup> 716 individuals from four ethnic groups. Gender and ethnicity were included as covariates in the adjusted linear regression analysis.

<sup>c</sup> 107 CEU individuals. Gender was included as covariates in the adjusted linear regression analysis.

**Supplementary Table S11:** Summary of correlations between the four SNPs and mRNA expression in prostate tissue from GTEx.

| <b>Gene</b>  | <b>SNP<sup>a</sup></b> | <b><i>P</i><sup>b</sup></b> | <b>Beta<sup>b</sup></b> | <b>SE<sup>b</sup></b> |
|--------------|------------------------|-----------------------------|-------------------------|-----------------------|
| <i>CD44</i>  | rs9666607 G>A          | 0.445                       | 0.096                   | 0.125                 |
| <i>ABCC1</i> | rs35605 C>T            | 0.018                       | 0.36                    | 0.148                 |
| <i>ABCC1</i> | rs212091 T>C           | 0.954                       | 0.009                   | 0.155                 |
| <i>GDF15</i> | rs1058587 C>G          | 0.887                       | 0.018                   | 0.129                 |

SNP: single nucleotide polymorphism; SE: standard error;

<sup>a</sup> Reference allele > effect allele;

<sup>b</sup> From single-tissue eQTL of GTEx Analysis Release V6p (dbGaP Accession phs000424.v6.p1).
